# Supplementary material
Source: PubMed Central journal article supplement (PMC1891219)
Supplement: pnas_0702254104_3.pdf [file pnas_0702254104_3.pdf]

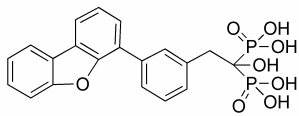

**BPH-629**

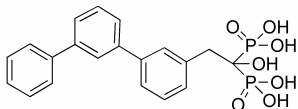

**BPH-608**

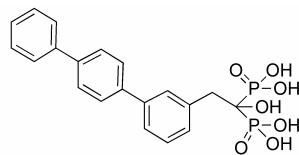

**BPH-628**

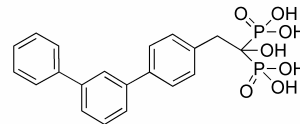

**BPH-626**

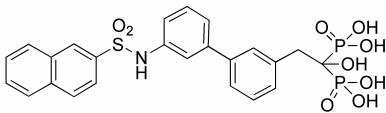

**BPH-675**

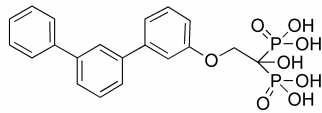

**BPH-676**

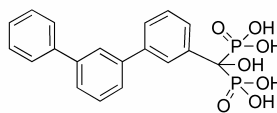

**BPH-640**

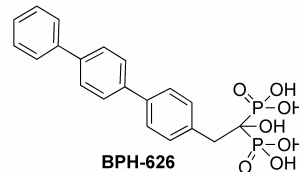

**BPH-626**

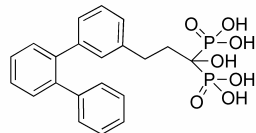

**BPH-621**

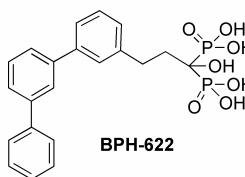

**BPH-622**

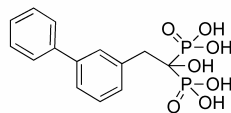

**BPH-294**

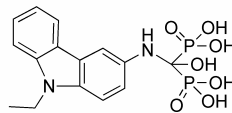

**BPH-228**

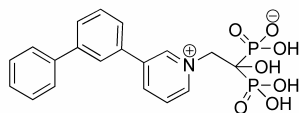

**BPH-364**

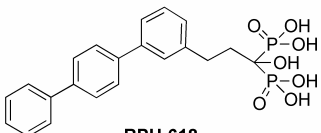

**BPH-618**

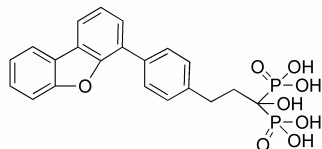

**BPH-646**

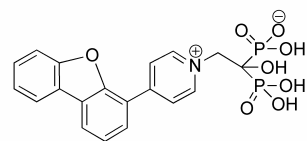

**BPH-642**

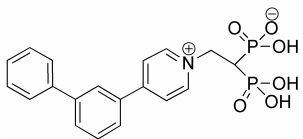

**BPH-633**

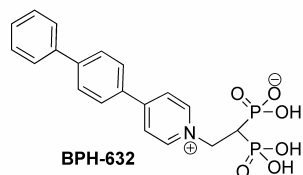

**BPH-632**

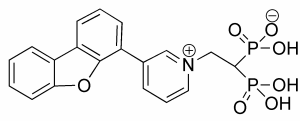

**BPH-641**

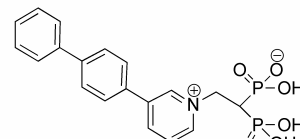

**BPH-620**

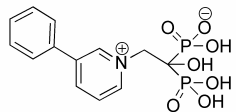

**BPH-300**

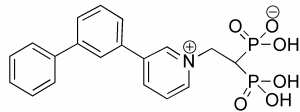

**BPH-614**

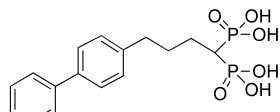

**BPH-674**

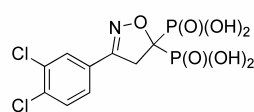

**BPH-663**

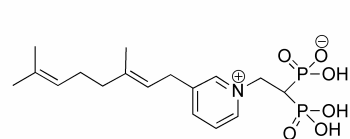

**BPH-601**

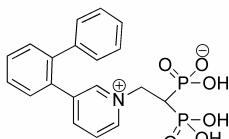

**BPH-619**

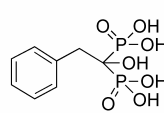

**BPH-11**

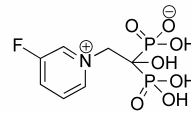

**BPH-461**

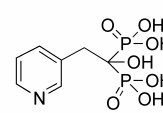

**BPH-2 (Risedronate)**
