# Supplementary material
Source: PubMed Central journal article supplement (PMC1891219)
Supplement: pnas_0702254104_12.pdf [file pnas_0702254104_12.pdf]

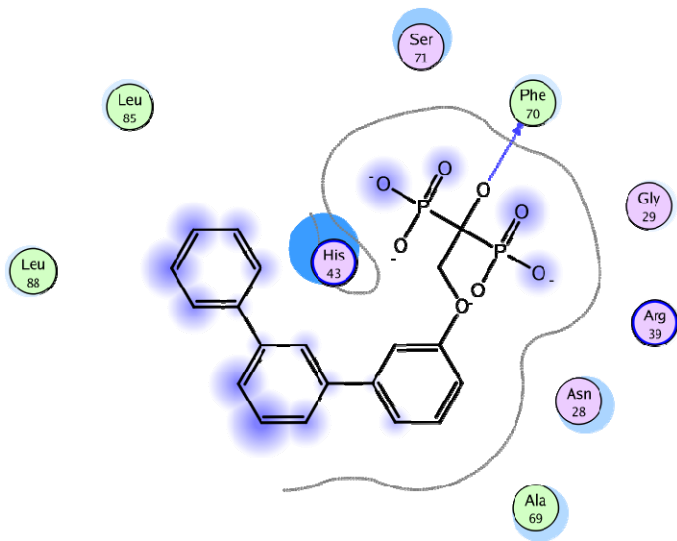

- |                     |                       |                     |
|---------------------|-----------------------|---------------------|
| ○ polar             | ⋯→ sidechain acceptor | ○ solvent residue   |
| ○ acidic            | ←⋯ sidechain donor    | ○ metal complex     |
| ○ basic             | ⋯→ backbone acceptor  | ⋯ solvent contact   |
| ○ greasy            | ←⋯ backbone donor     | ⋯ metal contact     |
| ○ proximity contour | ● ligand exposure     | ○ receptor exposure |
