# Supplementary material
Source: PubMed Central journal article supplement (PMC1891219)
Supplement: pnas_0702254104_16.pdf [file pnas_0702254104_16.pdf]

**Table 1. Data collection and refinement statistics for substrates and product bound to GGPPS**

| Names                         | GGPPs-Mg-IPP             | GGPPs-Mg-GPP                                  | GGPPs-Mg-FPP                                  | GGPPs-Mg-FsPP-IPP                             | GGPPs-GGPP             |
|-------------------------------|--------------------------|-----------------------------------------------|-----------------------------------------------|-----------------------------------------------|------------------------|
| Ligands                       | Mg <sup>2+</sup> and IPP | Mg <sup>2+</sup> and GPP                      | Mg <sup>2+</sup> and FPP                      | Mg <sup>2+</sup> , FsPP and IPP               | GGPP                   |
| Data Collection               |                          |                                               |                                               |                                               |                        |
| Space group                   | P2 <sub>1</sub>          | P2 <sub>1</sub> 2 <sub>1</sub> 2 <sub>1</sub> | P2 <sub>1</sub> 2 <sub>1</sub> 2 <sub>1</sub> | P2 <sub>1</sub> 2 <sub>1</sub> 2 <sub>1</sub> | P2 <sub>1</sub>        |
| Resolution, Å*                | 50-2.08<br>(2.15-2.08)   | 30-2.04<br>(2.11-2.04)                        | 50-2.55<br>(2.64-2.55)                        | 50-2.13<br>(2.21-2.13)                        | 30-1.80<br>(1.86-1.80) |
| Unit cell dimensions          |                          |                                               |                                               |                                               |                        |
| <i>a</i> , Å                  | 82.24                    | 47.09                                         | 45.77                                         | 47.38                                         | 82.35                  |
| <i>b</i> , Å                  | 47.71                    | 116.60                                        | 115.94                                        | 116.10                                        | 48.82                  |
| <i>c</i> , Å                  | 91.83                    | 128.32                                        | 126.75                                        | 128.25                                        | 93.24                  |
| $\beta$ , °                   | 110.71                   |                                               |                                               |                                               | 111.59                 |
| No. of reflections            |                          |                                               |                                               |                                               |                        |
| Observed                      | 201,573 (18579)          | 264,889 (22131)                               | 114,213 (6232)                                | 178,830 (12671)                               | 278,030 (24278)        |
| Unique                        | 40,504 (3953)            | 45,635 (4256)                                 | 21,952 (1833)                                 | 39,101 (3249)                                 | 63,682 (6225)          |
| Completeness, %               | 99.6 (98.4)              | 99.3 (94.1)                                   | 97.3 (82.8)                                   | 96.0 (81.3)                                   | 98.8 (97.1)            |
| <i>R</i> <sub>merge</sub> , % | 5.1 (25.5)               | 6.2 (50.3)                                    | 6.3 (22.5)                                    | 4.1 (18.6)                                    | 5.1 (52.2)             |
| I/ $\sigma$ (I)               | 29.4 (5.9)               | 28.9 (2.8)                                    | 20.3 (3.4)                                    | 28.9 (5.1)                                    | 28.0 (2.73)            |
| Refinement                    |                          |                                               |                                               |                                               |                        |
| No. of reflections            | 39,300 (3642)            | 43,414 (3627)                                 | 21,259 (1491)                                 | 38,181 (2763)                                 | 58,217 (4667)          |
| <i>R</i> <sub>work</sub> , %  | 19.8 (25.4)              | 20.4 (32.5)                                   | 18.5 (22.1)                                   | 19.6 (24.4)                                   | 19.8 (33.2)            |
| <i>R</i> <sub>free</sub> , %  | 25.7 (31.7)              | 24.9 (32.7)                                   | 23.9 (29.2)                                   | 25.0 (27.9)                                   | 24.2 (34.9)            |
| Geometry deviations           |                          |                                               |                                               |                                               |                        |
| Bond lengths, Å               | 0.020                    | 0.018                                         | 0.011                                         | 0.016                                         | 0.019                  |
| Bond angles, °                | 1.8                      | 1.7                                           | 1.4                                           | 1.6                                           | 1.7                    |
| No. of all protein atoms      |                          |                                               |                                               |                                               |                        |
| Mean B-values, Å <sup>2</sup> | 40.2                     | 47.0                                          | 37.9                                          | 41.6                                          | 30.9                   |
| No. of all cofactor atoms     |                          |                                               |                                               |                                               |                        |
| Mean B-values, Å <sup>2</sup> | 44.5                     | 48.6                                          | 55.0                                          | 63.9                                          | 31.3                   |
| No. of water molecules        |                          |                                               |                                               |                                               |                        |
| Mean B-values, Å <sup>2</sup> | 52.1                     | 49.9                                          | 42.5                                          | 54.3                                          | 53.4                   |
| Ramachandran plot, %          |                          |                                               |                                               |                                               |                        |
| Most favored                  | 95.1                     | 95.5                                          | 92.5                                          | 94.0                                          | 96.2                   |
| Additionally allowed          | 4.9                      | 4.3                                           | 7.3                                           | 6.0                                           | 3.8                    |
| Generously allowed            | 0                        | 0.2                                           | 0.2                                           | 0                                             | 0                      |

\*Values in the parentheses are for the highest-resolution shells.
