# Supplementary material
Source: PubMed Central journal article supplement (PMC1891219)
Supplement: pnas_0702254104_17.pdf [file pnas_0702254104_17.pdf]

**Table 2. Bisphosphonate inhibition of *S. cerevisiae* and *H. sapiens* GGPPS**

| Cpd ID                | <i>S. cerevisiae</i> GGPPS |                     | <i>H. sapiens</i> GGPPS |                     |
|-----------------------|----------------------------|---------------------|-------------------------|---------------------|
|                       | IC <sub>50</sub> (μM)      | K <sub>i</sub> (μM) | IC <sub>50</sub> (μM)   | K <sub>i</sub> (μM) |
| Zoledronate (BPH-91)  | 0.66                       | 0.26                | 97                      | 2.7                 |
| Minodronate (BPH-261) | 0.34                       | 0.13                | 65                      | 1.8                 |
| BPH-364               | 0.03                       | 0.01                | 8.2                     | 0.23                |
| BPH-608               | 0.07                       | 0.03                | 2.1                     | 0.06                |
| BPH-628               | 0.07                       | 0.03                | 0.72                    | 0.02                |
| BPH-629               | 0.28                       | 0.11                | 4.0                     | 0.11                |
| BPH-675               | 0.20                       | 0.08                | 2.6                     | 0.07                |
| BPH-676               | 0.14                       | 0.06                | 4.1                     | 0.11                |

Kinetic parameters for *S. cerevisiae* and *H. sapiens* GGPPS.

|                            | $K_m^{FPP}$ (μM) |
|----------------------------|------------------|
| <i>S. cerevisiae</i> GGPPS | 3.2              |
| <i>H. sapiens</i> GGPPS    | 0.71             |
