# Supplementary material
Source: PubMed Central journal article supplement (PMC1891219)
Supplement: pnas_0702254104_18.pdf [file pnas_0702254104_18.pdf]

**Table 3. Data collection and refinement statistics for GGPPS-bisphosphonate crystals**

| Crystals                      | BPH-91                                        | BPH-261                                       | BPH-629                                       | BPH-364                                       | BPH-675                                       |
|-------------------------------|-----------------------------------------------|-----------------------------------------------|-----------------------------------------------|-----------------------------------------------|-----------------------------------------------|
| Data collection               |                                               |                                               |                                               |                                               |                                               |
| Space group                   | P2 <sub>1</sub> 2 <sub>1</sub> 2 <sub>1</sub> |
| Resolution, Å*                | 30-2.14<br>(2.22-2.14)                        | 30-2.31<br>(2.39-2.31)                        | 50-2.12<br>(2.20-2.12)                        | 50-2.18<br>(2.26-2.18)                        | 50-2.2<br>(2.28-2.2)                          |
| Unit cell dimensions          |                                               |                                               |                                               |                                               |                                               |
| <i>a</i> , Å                  | 46.66                                         | 46.87                                         | 45.79                                         | 46.57                                         | 46.39                                         |
| <i>b</i> , Å                  | 116.29                                        | 116.05                                        | 115.82                                        | 116.39                                        | 116.26                                        |
| <i>c</i> , Å                  | 126.95                                        | 127.73                                        | 130.00                                        | 128.55                                        | 128.70                                        |
| No. of reflections            |                                               |                                               |                                               |                                               |                                               |
| Observed                      | 247,933 (19355)                               | 153,941 (13757)                               | 174,254 (12421)                               | 194,150 (13786)                               | 246,740 (23819)                               |
| Unique                        | 39,184 (3795)                                 | 30,293 (2866)                                 | 38,573 (3357)                                 | 36,250 (2997)                                 | 36,490 (3555)                                 |
| Completeness, %               | 99.5 (98.2)                                   | 96.2 (93.1)                                   | 96.6 (85.2)                                   | 96.8 (81.6)                                   | 99.9 (99.9)                                   |
| <i>R</i> <sub>merge</sub> , % | 10.6 (44.2)                                   | 7.3 (45.1)                                    | 4.2 (20.9)                                    | 4.5 (16.8)                                    | 8.5 (42.4)                                    |
| I/σ(I)                        | 23.1 (4.6)                                    | 21.1 (3.3)                                    | 28.7 (4.1)                                    | 29.6 (4.7)                                    | 26.1 (5.5)                                    |
| Refinement                    |                                               |                                               |                                               |                                               |                                               |
| No. of reflections            | 36,847 (3379)                                 | 28,699 (2490)                                 | 37,579 (2907)                                 | 35,219 (2818)                                 | 34,526 (3191)                                 |
| <i>R</i> <sub>work</sub> , %  | 19.7 (24.2)                                   | 19.9 (29.4)                                   | 16.7 (18.1)                                   | 18.0 (21.0)                                   | 18.5 (24.0)                                   |
| <i>R</i> <sub>free</sub> , %  | 24.9 (27.5)                                   | 25.7 (36.8)                                   | 21.7 (24.2)                                   | 23.6 (25.5)                                   | 24.1 (29.0)                                   |
| Geometry deviations           |                                               |                                               |                                               |                                               |                                               |
| Bond lengths, Å               | 0.018                                         | 0.015                                         | 0.020                                         | 0.015                                         | 0.019                                         |
| Bond angles, °                | 1.7                                           | 1.6                                           | 1.7                                           | 1.5                                           | 1.7                                           |
| No. of all protein atoms      |                                               |                                               |                                               |                                               |                                               |
| Mean B-values, Å <sup>2</sup> | 41.8                                          | 48.2                                          | 34.7                                          | 38.2                                          | 40.0                                          |
| No. of all cofactor atoms     |                                               |                                               |                                               |                                               |                                               |
| Mean B-values, Å <sup>2</sup> | 38.7                                          | 51.8                                          | 36.5                                          | 64.4                                          | 61.3                                          |
| No. of water molecules        |                                               |                                               |                                               |                                               |                                               |
| Mean B-values, Å <sup>2</sup> | 54.9                                          | 59.5                                          | 48.5                                          | 55.6                                          | 46.2                                          |
| Ramachandran plot, %          |                                               |                                               |                                               |                                               |                                               |
| Most favored                  | 97.1                                          | 94.3                                          | 95.3                                          | 95.3                                          | 94.9                                          |
| Additionally allowed          | 2.9                                           | 5.7                                           | 4.7                                           | 4.3                                           | 5.1                                           |
| Generously allowed            | 0                                             | 0                                             | 0                                             | 0.4                                           | 0                                             |

\*Values in parentheses are for the highest-resolution shells.
