# Supplementary material
Source: PubMed Central journal article supplement (PMC1891219)
Supplement: pnas_0702254104_19.pdf [file pnas_0702254104_19.pdf]

**Table 4. Experimental IC<sub>50</sub> and pIC<sub>50</sub> values for UPPS enzyme inhibition**

| Cpd ID*             | UPPS<br>IC <sub>50</sub> (μM) | UPPS<br>pIC <sub>50</sub> (M) |
|---------------------|-------------------------------|-------------------------------|
| BPH-629             | 0.59                          | 6.2                           |
| BPH-608             | 0.69                          | 6.2                           |
| BPH-628             | 0.91                          | 6.0                           |
| BPH-625             | 1.0                           | 6.0                           |
| BPH-675             | 1.1                           | 6.0                           |
| BPH-676             | 1.3                           | 5.9                           |
| BPH-640             | 1.8                           | 5.8                           |
| BPH-626             | 2.0                           | 5.7                           |
| BPH-621             | 3.1                           | 5.5                           |
| BPH-622             | 5.5                           | 5.3                           |
| BPH-294             | 6.8                           | 5.2                           |
| BPH-228             | 7.8                           | 5.1                           |
| BPH-364             | 10                            | 5                             |
| BPH-618             | 10                            | 5.0                           |
| BPH-646             | 12                            | 4.9                           |
| BPH-642             | 13                            | 4.9                           |
| BPH-633             | 21                            | 4.7                           |
| BPH-632             | 28                            | 4.6                           |
| BPH-641             | 34                            | 4.5                           |
| BPH-620             | 35                            | 4.5                           |
| BPH-300             | 48                            | 4.3                           |
| BPH-614             | 68                            | 4.2                           |
| BPH-674             | 69                            | 4.2                           |
| BPH-663             | 87                            | 4.1                           |
| BPH-601             | 89                            | 4.1                           |
| BPH-619             | 120                           | 3.9                           |
| BPH-11              | 200                           | 3.7                           |
| BPH-461             | 490                           | 3.3                           |
| Risedronate (BPH-2) | 660                           | 3.2                           |

\*Structures are shown in SI Fig. 9.
