# Supplementary material
Source: PubMed Central journal article supplement (PMC1891219)
Supplement: pnas_0702254104_20.pdf [file pnas_0702254104_20.pdf]

**Table 5. Data collection and refinement statistics for UPPS-bisphosphonate crystals**

| Crystals                         | BPH-629                                       | BPH-608                                       | BPH-628                                       | BPH-675                                       | BPH-676                                       |
|----------------------------------|-----------------------------------------------|-----------------------------------------------|-----------------------------------------------|-----------------------------------------------|-----------------------------------------------|
| Data collection                  |                                               |                                               |                                               |                                               |                                               |
| Space group                      | P2 <sub>1</sub> 2 <sub>1</sub> 2 <sub>1</sub> |
| Resolution, Å*                   | 30-1.9<br>(1.97-1.9)                          | 30-2.0<br>(2.07-2.0)                          | 30-2.1<br>(2.18-2.1)                          | 30-2.05<br>(2.12-2.05)                        | 30-2.5<br>(2.59-2.5)                          |
| Unit cell dimensions             |                                               |                                               |                                               |                                               |                                               |
| <i>a</i> , Å                     | 64.02                                         | 64.29                                         | 63.68                                         | 63.54                                         | 62.97                                         |
| <i>b</i> , Å                     | 66.23                                         | 68.16                                         | 68.16                                         | 68.69                                         | 68.29                                         |
| <i>c</i> , Å                     | 111.28                                        | 109.91                                        | 109.89                                        | 110.03                                        | 110.23                                        |
| No. of reflections               |                                               |                                               |                                               |                                               |                                               |
| Observed                         | 366,529 (35668)                               | 263,413 (26463)                               | 163,527 (15367)                               | 222,476 (22555)                               | 130,566 (13415)                               |
| Unique                           | 39,256 (3877)                                 | 33,217 (3267)                                 | 28,571 (2794)                                 | 30,788 (3048)                                 | 16,798 (1639)                                 |
| Completeness, %                  | 99.8 (100)                                    | 99.9 (100)                                    | 99.5 (99.1)                                   | 99.7 (100)                                    | 97.3 (97.1)                                   |
| <i>R</i> <sub>merge</sub> , %    | 5.2 (44.4)                                    | 5.8 (46.4)                                    | 4.6 (47.0)                                    | 4.5 (44.6)                                    | 5.8 (41.3)                                    |
| <i>I</i> / $\sigma$ ( <i>I</i> ) | 38.2 (5.5)                                    | 36.6 (5.0)                                    | 34.2 (3.6)                                    | 39.9 (4.6)                                    | 41.8 (6.3)                                    |
| Refinement                       |                                               |                                               |                                               |                                               |                                               |
| No. of reflections               | 38,115 (3559)                                 | 32,558 (2969)                                 | 27,661 (2536)                                 | 30,143 (2782)                                 | 16,326 (1538)                                 |
| <i>R</i> <sub>work</sub> , %     | 18.7 (20.7)                                   | 19.1 (21.3)                                   | 20.0 (25.5)                                   | 20.9 (26.7)                                   | 22.4 (29.7)                                   |
| <i>R</i> <sub>free</sub> , %     | 23.6 (24.4)                                   | 23.8 (27.4)                                   | 24.2 (30.7)                                   | 24.8 (30.5)                                   | 28.4 (40.3)                                   |
| Geometry deviations              |                                               |                                               |                                               |                                               |                                               |
| Bond lengths, Å                  | 0.019                                         | 0.017                                         | 0.015                                         | 0.015                                         | 0.016                                         |
| Bond angles, °                   | 1.8                                           | 1.6                                           | 1.6                                           | 1.7                                           | 1.7                                           |
| No. of all protein atoms         | 3,535                                         | 3,545                                         | 3,443                                         | 3,345                                         | 3,470                                         |
| Mean B-values, Å <sup>2</sup>    | 33.1                                          | 36.3                                          | 47.1                                          | 44.1                                          | 53.5                                          |
| No. of all cofactor atoms        | 192                                           | 145                                           | 68                                            | 121                                           | 90                                            |
| Mean B-values, Å <sup>2</sup>    | 44.6                                          | 51.1                                          | 77.1                                          | 89.3                                          | 85.0                                          |
| No. of water molecules           | 458                                           | 270                                           | 310                                           | 301                                           | 206                                           |
| Mean B-values, Å <sup>2</sup>    | 54.1                                          | 48.7                                          | 59.3                                          | 58.1                                          | 58.6                                          |
| Ramachandran plot, %             |                                               |                                               |                                               |                                               |                                               |
| Most favored                     | 96.0                                          | 94.7                                          | 93.0                                          | 93.6                                          | 92.0                                          |
| Additionally allowed             | 4.0                                           | 5.3                                           | 7.0                                           | 6.4                                           | 8.0                                           |
| Generously allowed               | 0                                             | 0                                             | 0                                             | 0                                             | 0                                             |

\*Values in parentheses are for the highest-resolution shells.
