# Supplementary material
Source: PubMed Central journal article supplement (PMC1891219)
Supplement: pnas_0702254104_21.pdf [file pnas_0702254104_21.pdf]

**Table 6. UPPS 2D-QSAR output**

QuaSAR-Model (PLS) : /Volumes/hudock/MOE/UPPS/122106/qsar\_5\_122106-v1.mdb  
Tue Jan 9 15:53:14 2007

Activity Field : UPPC\_pIC50  
Weight Field :  
Condition Limit : 1e+06  
Component Limit : 0

Observations : 29  
Descriptors : 4  
Components Used : 4  
Condition Number : 7207.2837

ROOT MEAN SQUARE ERROR (RMSE) : 0.32774  
CORRELATION COEFFICIENT (R2) : 0.85352  
CROSS-VALIDATED RMSE : 0.43369  
CROSS-VALIDATED R2 : 0.75871

## ESTIMATED LINEAR MODEL

UPPC\_pIC50 =  
1.40017  
-0.00044 \* CASA-  
-0.03311 \* PEOE\_VSA+3  
-0.03824 \* SlogP\_VSA8  
+0.01470 \* VSA

## ESTIMATED NORMALIZED LINEAR MODEL (SD = Standard Deviation)

UPPC\_pIC50 / SD(UPPC\_pIC50) =  
1.63509  
-0.34334 \* CASA- / SD(CASA-)  
-0.68892 \* PEOE\_VSA+3 / SD(PEOE\_VSA+3)  
-0.49988 \* SlogP\_VSA8 / SD(SlogP\_VSA8)  
+1.02660 \* VSA / SD(VSA)

## RELATIVE IMPORTANCE OF DESCRIPTORS

**0.334438** CASA-  
**0.671064** PEOE\_VSA+3  
**0.486927** SlogP\_VSA8  
**1.000000** VSA

---

| MOE Descriptor | Brief description |
|----------------|-------------------|
|----------------|-------------------|

---

|            |                                                                                                                                                                                                                                                                                                                                                                                                          |
|------------|----------------------------------------------------------------------------------------------------------------------------------------------------------------------------------------------------------------------------------------------------------------------------------------------------------------------------------------------------------------------------------------------------------|
| CASA-      | Negative charge weighted surface area                                                                                                                                                                                                                                                                                                                                                                    |
| PEOE_VSA+3 | Sub divided surface area partial charge descriptor (Gasteiger method). Sub divided surface area descriptors are based on approximate assessable van der Waals surface area for each atom $v_i$ along with another property $p_i$ . The descriptor is defined as the sum of the $v_i$ over all atoms such that $p_i$ is in a specified range. In this case, $p_i$ is partial charge in range [0.15,0.20]. |
| SLogP_VSA8 | Sub divided surface area SLogP descriptor. In this case, $p_i$ is SLogP in range [0.30, 0.40].                                                                                                                                                                                                                                                                                                           |
| VSA        | van der Waals surface area calculated by using polyhedral representation of each atom.                                                                                                                                                                                                                                                                                                                   |

---
