# Supplementary material
Source: PubMed Central journal article supplement (PMC1891219)
Supplement: pnas_0702254104_22.pdf [file pnas_0702254104_22.pdf]

**Table 7. Experimental and 2D-QSAR predicted pIC<sub>50</sub> values for UPPS enzyme inhibition**

| Cpd ID* | Experimental                  | Predicted                          |          | Cross-validated†                   |          |
|---------|-------------------------------|------------------------------------|----------|------------------------------------|----------|
|         | UPPS<br>pIC <sub>50</sub> , M | Predicted<br>pIC <sub>50</sub> , M | Residual | Predicted<br>pIC <sub>50</sub> , M | Residual |
| BPH-629 | 6.23                          | 5.76                               | 0.47     | 5.71                               | 0.53     |
| BPH-608 | 6.16                          | 5.9                                | 0.26     | 5.86                               | 0.3      |
| BPH-628 | 6.04                          | 5.83                               | 0.21     | 5.81                               | 0.23     |
| BPH-625 | 5.99                          | 5.87                               | 0.12     | 5.85                               | 0.14     |
| BPH-675 | 5.95                          | 6.34                               | -0.39    | 6.92                               | -0.98    |
| BPH-676 | 5.89                          | 5.44                               | 0.45     | 5.41                               | 0.48     |
| BPH-640 | 5.75                          | 5.61                               | 0.14     | 5.6                                | 0.16     |
| BPH-626 | 5.7                           | 5.88                               | -0.18    | 5.91                               | -0.21    |
| BPH-621 | 5.51                          | 5.5                                | 0.01     | 5.5                                | 0.01     |
| BPH-622 | 5.26                          | 5.26                               | 0        | 5.27                               | 0        |
| BPH-294 | 5.17                          | 4.99                               | 0.18     | 4.96                               | 0.21     |
| BPH-228 | 5.11                          | 5.02                               | 0.09     | 5.01                               | 0.1      |
| BPH-364 | 5                             | 4.78                               | 0.22     | 4.76                               | 0.24     |
| BPH-618 | 4.99                          | 5.37                               | -0.38    | 5.42                               | -0.43    |
| BPH-646 | 4.92                          | 5.3                                | -0.38    | 5.35                               | -0.43    |
| BPH-642 | 4.87                          | 4.54                               | 0.33     | 4.5                                | 0.37     |
| BPH-633 | 4.67                          | 4.63                               | 0.03     | 4.63                               | 0.04     |
| BPH-632 | 4.56                          | 4.58                               | -0.02    | 4.58                               | -0.02    |
| BPH-641 | 4.47                          | 4.54                               | -0.08    | 4.55                               | -0.09    |
| BPH-620 | 4.45                          | 4.6                                | -0.14    | 4.61                               | -0.16    |
| BPH-300 | 4.32                          | 3.84                               | 0.48     | 3.77                               | 0.55     |
| BPH-614 | 4.17                          | 4.59                               | -0.41    | 4.64                               | -0.46    |
| BPH-674 | 4.16                          | 4.12                               | 0.03     | 4.11                               | 0.05     |
| BPH-663 | 4.06                          | 3.6                                | 0.46     | 3.27                               | 0.79     |
| BPH-601 | 4.05                          | 3.94                               | 0.11     | 3.82                               | 0.23     |
| BPH-619 | 3.91                          | 4.62                               | -0.72    | 4.71                               | -0.8     |
| BPH-11  | 3.7                           | 4.02                               | -0.33    | 4.13                               | -0.43    |
| BPH-461 | 3.31                          | 3.13                               | 0.17     | 3.07                               | 0.24     |
| BPH-2   | 3.18                          | 3.93                               | -0.75    | 4.19                               | -1.01    |

\*Structures are shown in SI Fig. 9.

†Cross validated predictions obtained using a leave-one-out validation scheme as implemented in the QuaSAR validation module of MOE 2006.08 (Chemical Computing Group Inc., Montreal, Canada).
