# Supplementary material
Source: PubMed Central journal article supplement (PMC1891219)
Supplement: pnas_0702254104_23.pdf [file pnas_0702254104_23.pdf]

**Table 8. Hologram (HQSAR) output for UPPS**

---

|                                |                             |
|--------------------------------|-----------------------------|
| Hologram lengths               | 97, 151, 199, 257, 307, 353 |
| Minimum atoms in fragment      | 4                           |
| Maximum atoms in fragment      | 5                           |
| Include bond information       | 1                           |
| Include connection information | 1                           |
| Include hydrogens              | 1                           |
| Use chiral fragments           | 0                           |
| <hr/>                          |                             |
| <b>Cross-validated model</b>   |                             |
| $R^2$                          | 0.737                       |
| StdErr                         | 0.472                       |
| <b>Full model</b>              |                             |
| $R^2$                          | 0.859                       |
| StdErr                         | 0.346                       |
| <b>Ensemble model</b>          |                             |
| $R^2$                          | 0.707                       |
| StdErr                         | 0.499                       |
| <br>                           |                             |
| Best length                    | 97                          |
| Components                     | 3                           |

---

Sybyl 7.3 HQSAR module (Tripos Inc., St. Louis, MO)
