# Supplementary material
Source: PubMed Central journal article supplement (PMC1891219)
Supplement: pnas_0702254104_24.pdf [file pnas_0702254104_24.pdf]

**Table 9. Experimental and HQSAR predicted pIC<sub>50</sub> values for UPPS inhibition**

| Cpd ID*             | UPPS<br>pIC <sub>50</sub> , M | Predicted<br>pIC <sub>50</sub> , M | Cross-<br>validated<br>predicted <sup>†</sup><br>pIC <sub>50</sub> , M |
|---------------------|-------------------------------|------------------------------------|------------------------------------------------------------------------|
| BPH-629             | 6.23                          | 5.83                               | 5.73                                                                   |
| BPH-608             | 6.16                          | 5.88                               | 5.82                                                                   |
| BPH-628             | 6.04                          | 5.85                               | 5.79                                                                   |
| BPH-625             | 5.99                          | 5.86                               | 5.82                                                                   |
| BPH-675             | 5.95                          | 6.15                               | 6.17                                                                   |
| BPH-676             | 5.89                          | 5.4                                | 5.15                                                                   |
| BPH-640             | 5.75                          | 5.87                               | 5.87                                                                   |
| BPH-626             | 5.7                           | 5.83                               | 5.84                                                                   |
| BPH-621             | 5.51                          | 5.32                               | 5.23                                                                   |
| BPH-622             | 5.26                          | 5.29                               | 5.29                                                                   |
| BPH-294             | 5.17                          | 4.91                               | 4.85                                                                   |
| BPH-228             | 5.11                          | 4.96                               | 4.65                                                                   |
| BPH-364             | 5.0                           | 5.05                               | 5.04                                                                   |
| BPH-618             | 4.99                          | 5.26                               | 5.35                                                                   |
| BPH-646             | 4.92                          | 5.24                               | 5.51                                                                   |
| BPH-642             | 4.87                          | 4.69                               | 4.62                                                                   |
| BPH-633             | 4.67                          | 4.68                               | 4.66                                                                   |
| BPH-632             | 4.56                          | 4.65                               | 4.65                                                                   |
| BPH-641             | 4.47                          | 4.68                               | 4.76                                                                   |
| BPH-620             | 4.45                          | 4.62                               | 4.64                                                                   |
| BPH-300             | 4.32                          | 4.06                               | 4.0                                                                    |
| BPH-614             | 4.17                          | 4.67                               | 4.75                                                                   |
| BPH-674             | 4.16                          | 3.91                               | 3.88                                                                   |
| BPH-663             | 4.06                          | 3.92                               | 4.08                                                                   |
| BPH-601             | 4.05                          | 3.26                               | 2.99                                                                   |
| BPH-619             | 3.91                          | 4.7                                | 4.89                                                                   |
| BPH-11              | 3.7                           | 3.92                               | 4.03                                                                   |
| BPH-461             | 3.31                          | 3.39                               | 3.47                                                                   |
| Risedronate (BPH-2) | 3.18                          | 3.71                               | 4.01                                                                   |

\*Structures are shown in SI Fig. 9.

<sup>†</sup>Cross-validated predictions obtained using a leave-one-out validation scheme as implemented in the HQSAR module of Sybyl 7.3 (Tripos Inc., St. Louis, MO).
