# Supplementary material
Source: PubMed Central journal article supplement (PMC1891219)
Supplement: pnas_0702254104_26.pdf [file pnas_0702254104_26.pdf]

**Table 11. Prenyltransferase inhibition results**

| Cpd ID               | <i>S. cerevisiae</i>  | <i>S. solfataricus</i> | <i>E. coli</i>        |
|----------------------|-----------------------|------------------------|-----------------------|
|                      | GGPPS                 | HPPS                   | OPPS                  |
|                      | IC <sub>50</sub> , μM | IC <sub>50</sub> , μM  | IC <sub>50</sub> , μM |
| Zoledronate (BPH-91) | 0.66                  | 0.09                   | 0.038                 |
| Mindronate (BPH-261) | 0.34                  | 0.05                   | 2.1                   |
| BPH-364              | 0.03                  | 0.72                   | 0.02                  |
| BPH-608              | 0.08                  | 0.46                   | 0.43                  |
| BPH-628              | 0.07                  | 2.7                    | 870                   |
| BPH-629              | 0.28                  | 1.2                    | 32                    |
| BPH-675              | 0.20                  | 0.42                   | 5.4                   |
| BPH-676              | 0.14                  | 360                    | 0.075                 |
