# Supplementary material
Source: PubMed Central journal article supplement (PMC1891219)

A

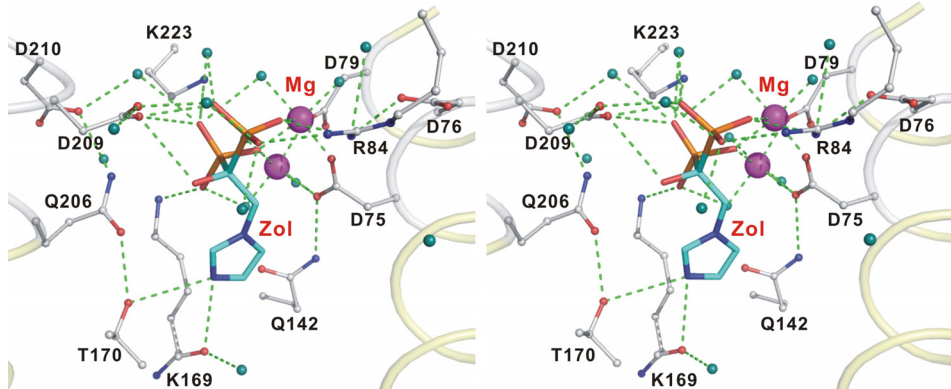

B

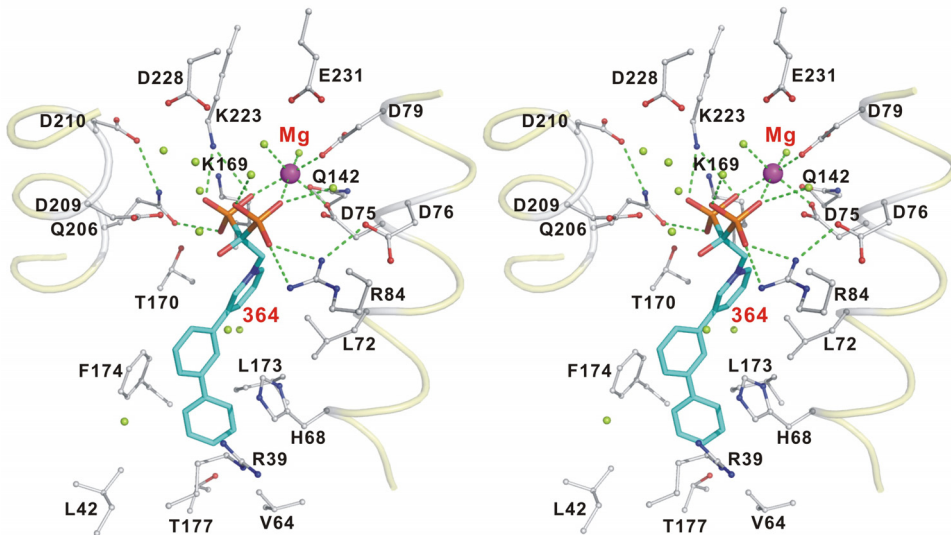

Supplement: pnas_0702254104_1.pdf [file pnas_0702254104_1.pdf]

**A**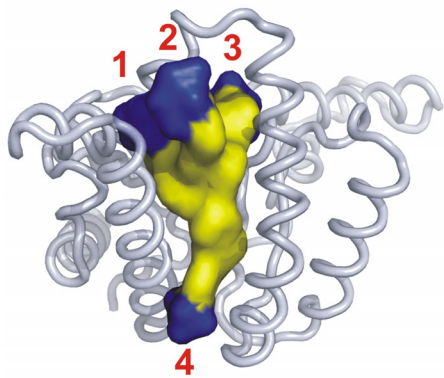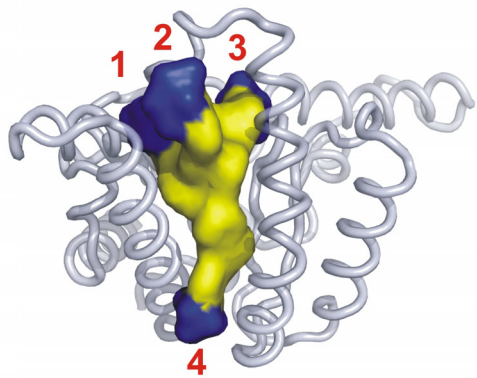**B**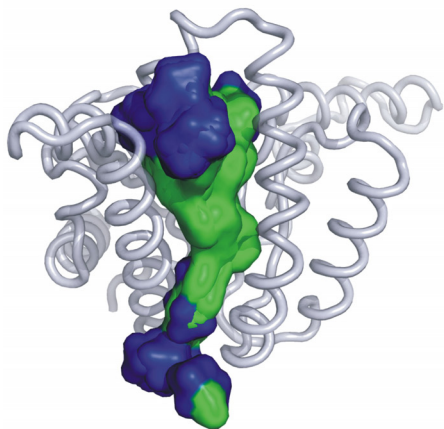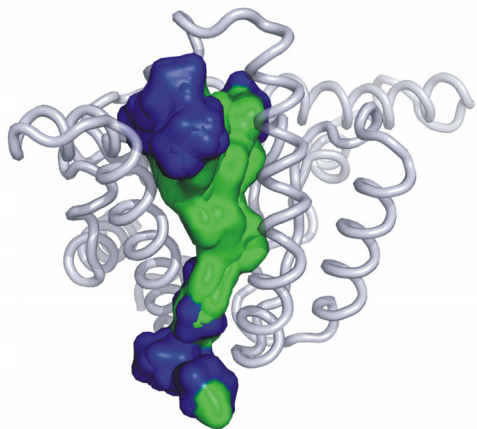

Supplement: pnas_0702254104_13.pdf [file pnas_0702254104_13.pdf]

plC<sub>50</sub> [M], predicted

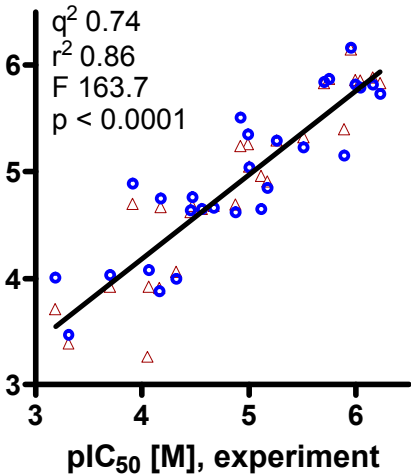

Supplement: pnas_0702254104_14.pdf [file pnas_0702254104_14.pdf]

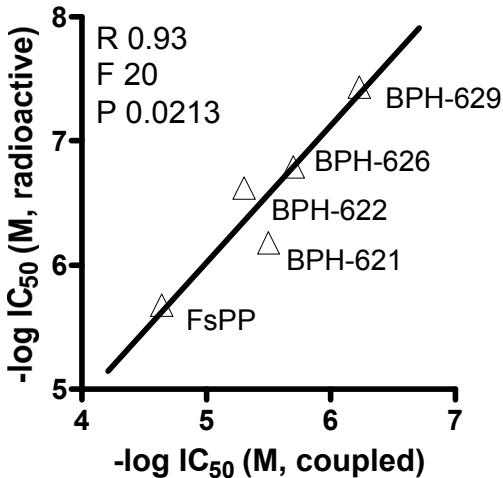

Supplement: pnas_0702254104_15.pdf [file pnas_0702254104_15.pdf]

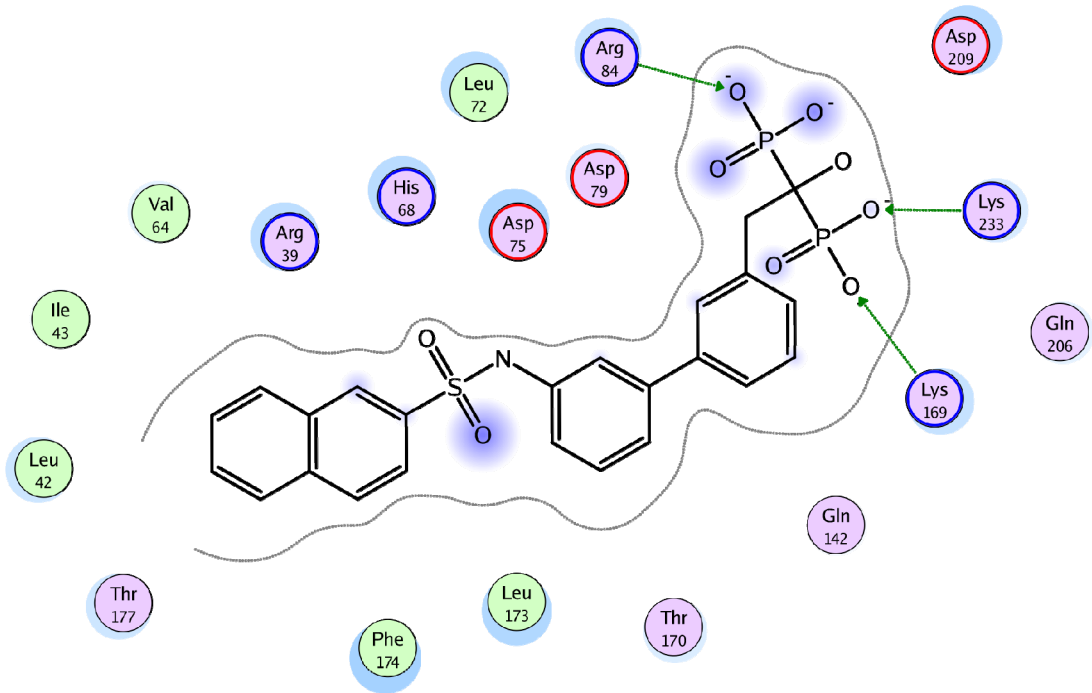

Supplement: pnas_0702254104_2.pdf [file pnas_0702254104_2.pdf]

608-A

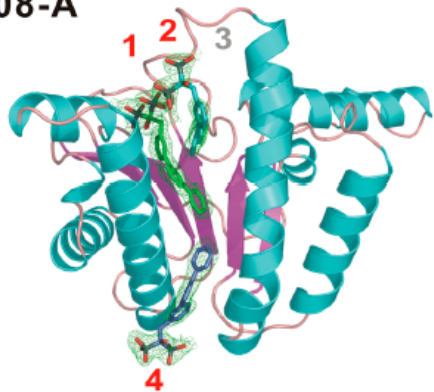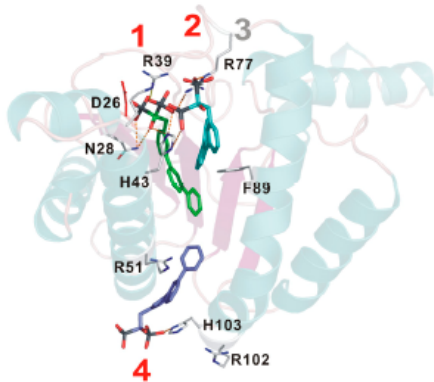

608-B

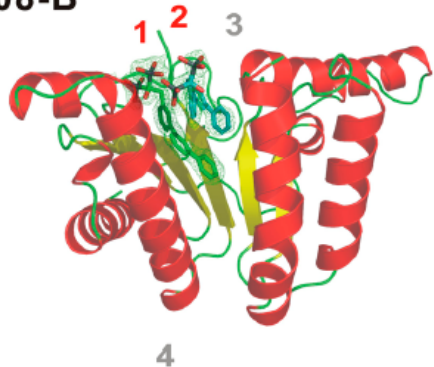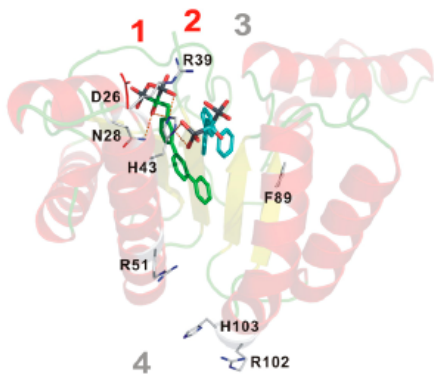

Supplement: pnas_0702254104_4.pdf [file pnas_0702254104_4.pdf]

**628-A**

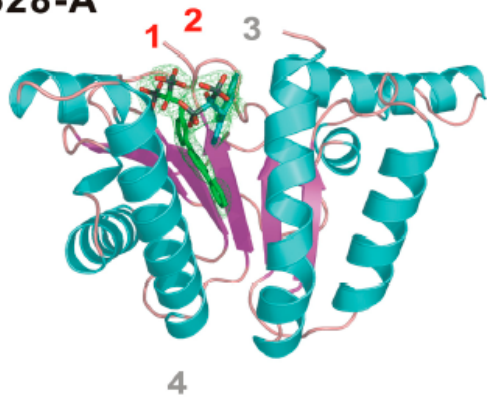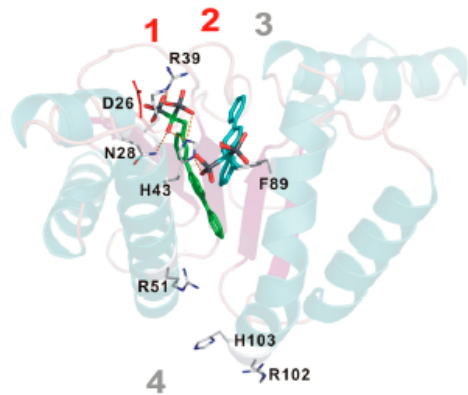

**628-B**

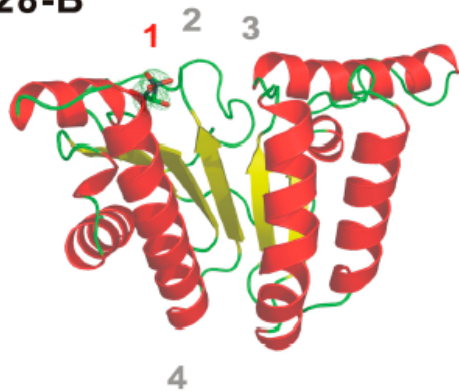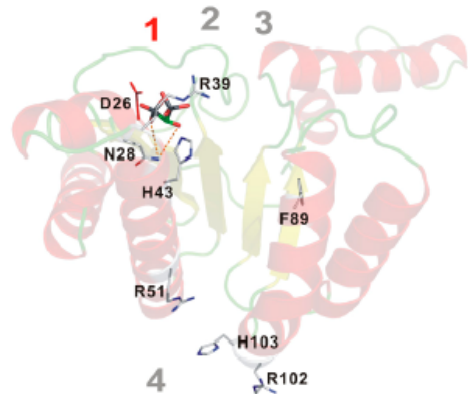

Supplement: pnas_0702254104_5.pdf [file pnas_0702254104_5.pdf]

675-A

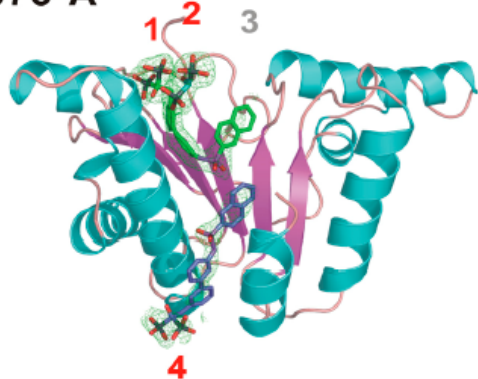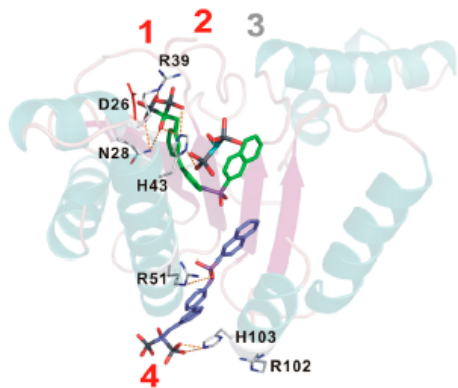

675-B

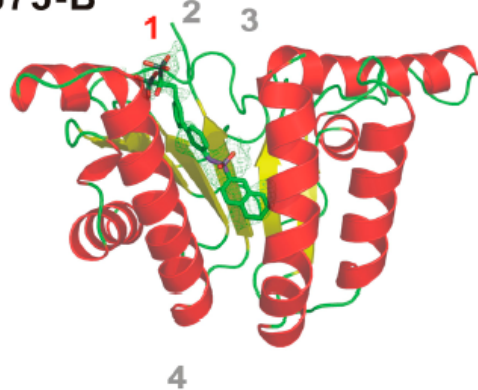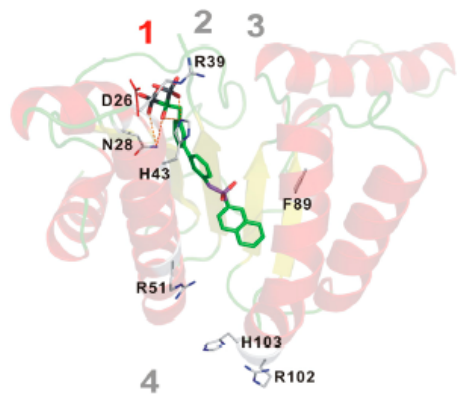

Supplement: pnas_0702254104_6.pdf [file pnas_0702254104_6.pdf]

676-A

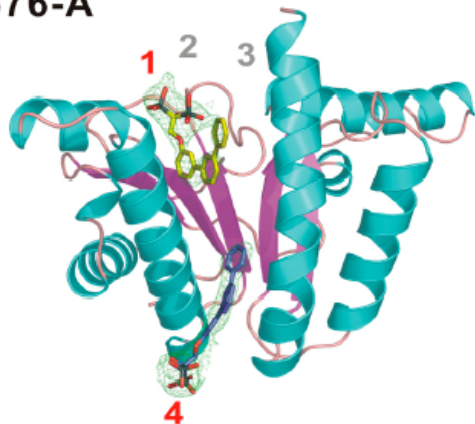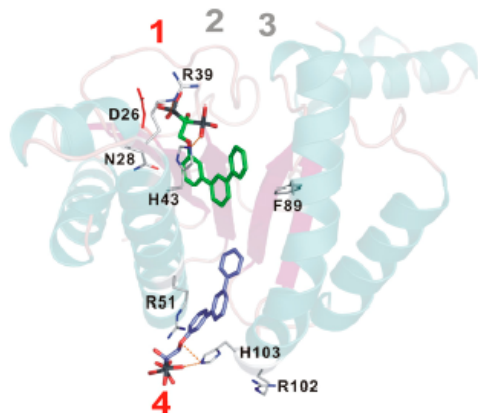

676-B

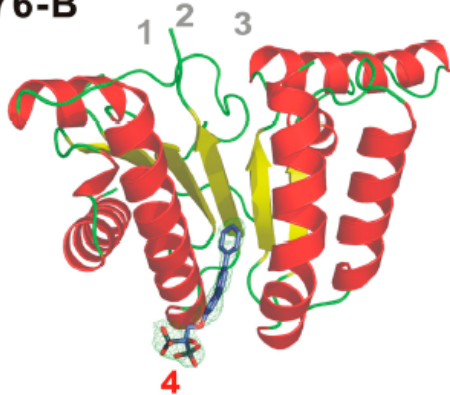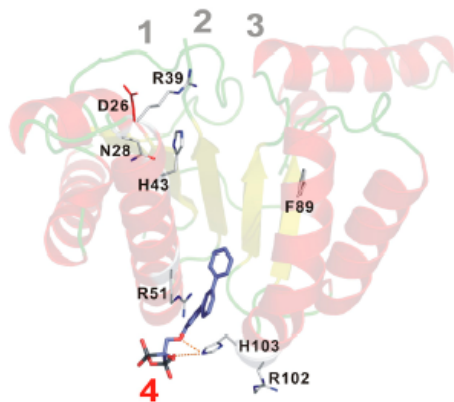

Supplement: pnas_0702254104_7.pdf [file pnas_0702254104_7.pdf]

Site 1

Site 2

Site 3

Site 4

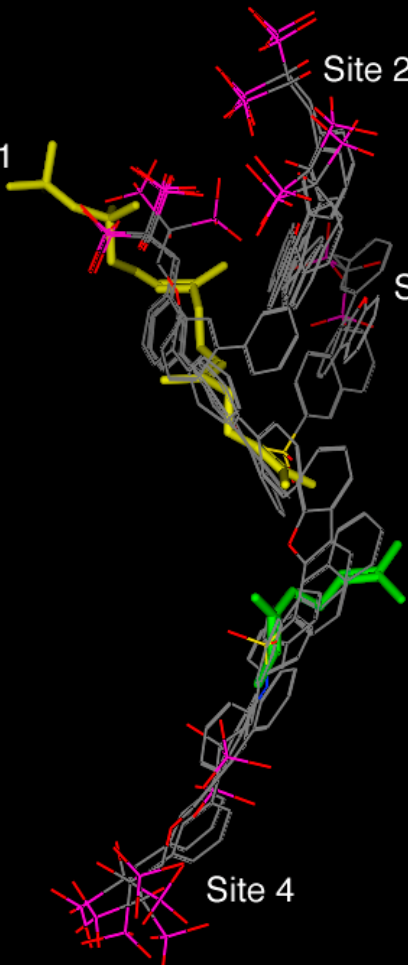

Supplement: pnas_0702254104_8.pdf [file pnas_0702254104_8.pdf]
